# Supplementary material for: Insertion of the Type-I IFN Decoy Receptor B18R in a miRNA-Tagged Semliki Forest Virus Improves Oncolytic Capacity but Results in Neurotoxicity
Source: PubMed Central journal article supplement — Mol Ther Oncolytics. 2017 Oct 5;7:67–75. doi: 10.1016/j.omto.2017.10.001 (PMC5684435; doi:10.1016/j.omto.2017.10.001), 2017-10-05
Supplement: mmc1.pdf [file mmc1.pdf]

OMTO, Volume 7

## **Supplemental Information**

### **Insertion of the Type-I IFN Decoy Receptor B18R in a miRNA-Tagged Semliki Forest Virus Improves Oncolytic Capacity but Results in Neurotoxicity**

**Tina Sarén, Mohanraj Ramachandran, Miika Martikainen, and Di Yu**

## Supplemental results

Figure S1

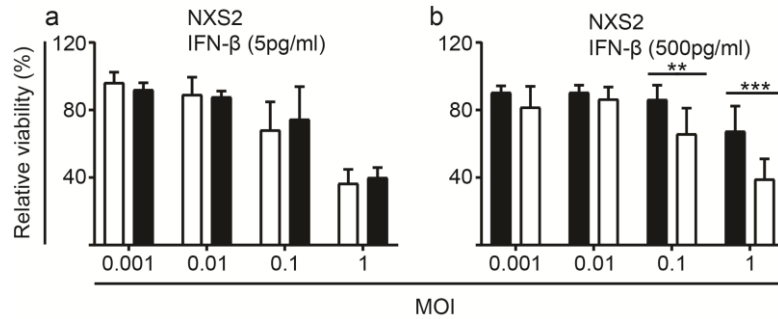

**Figure S1. Difference in oncolytic capacity against NXS2 cells at higher amounts of IFN-β.** The ability of SFV4miRT and SFV4B18RmiRT to kill NXS2 was assessed in the presence of **a)** 5pg/ml or **b)** 500pg/ml exogenous mIFN-β. Cells were infected with an MOI gradient ranging from 0.001-1 and cell viability was determined using alamarBlue assay 72hrs after infection. The experiment was repeated two times with internal triplicates. Values are shown as mean + SEM and were compared by two-way ANOVA with Holm-Sidak post hoc test (\*\*\*=p<0.001, \*\*=p<0.01).

Figure S2

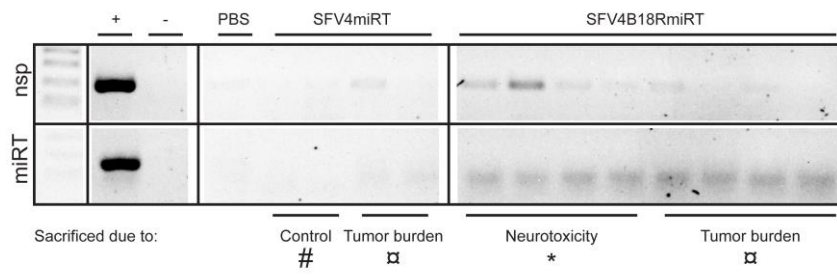

**Figure S2. miRT cassette could not be detected *in vivo*.** PCR detection of SFV (nsP) and miRT in the mouse brain samples. Each band represents a sample from an individual mouse. Plasmids with or without target were used as positive (+) and negative (-) controls.
